# Supplementary material for: Modulation of Zn/Cd P1B2-ATPase activities in Arabidopsis impacts differently on Zn and Cd contents in shoots and seeds
Source: Royal Society of Chemistry journal article supplement (doi:10.1039/c4mt00182f), 2014-01-01
Supplement: c4mt00182f1.pdf [file c4mt00182f1.pdf]

Supplementary Table 1

| Lines            | Gene number | Ecotype | Stock Ref.         | Described in               | Expr. level vs wild-type *         |
|------------------|-------------|---------|--------------------|----------------------------|------------------------------------|
| <i>hma2-4</i>    | At4g30110   | Ws      | SALK-050924        | Hussain <i>et al.</i> 2004 | nil                                |
| <i>hma4-2</i>    | At2g10110   | Ws      | SALK-034393        | Hussain <i>et al.</i> 2004 | nil                                |
| <i>35S::HMA4</i> | At2g10110   | Col     | NASC N9416-17      | Verret <i>et al.</i> 2004  | Fig 44 F. Verret's PhD thesis 2004 |
| <i>35S::HMA3</i> | At4g30120   | Ws      | request to authors | Morel <i>et al.</i> 2009   | Tab S2 in Morel <i>et al.</i> 2009 |

**Table S1** Main characteristics of the different lines used in this study. \* Quantification using ImageJ software estimated an increase in the expression levels by 5.8 – 6.8 fold for the *35S::HMA3* lines and around 6 fold for the *35S::HMA4* lines.

Supplementary Figure 1

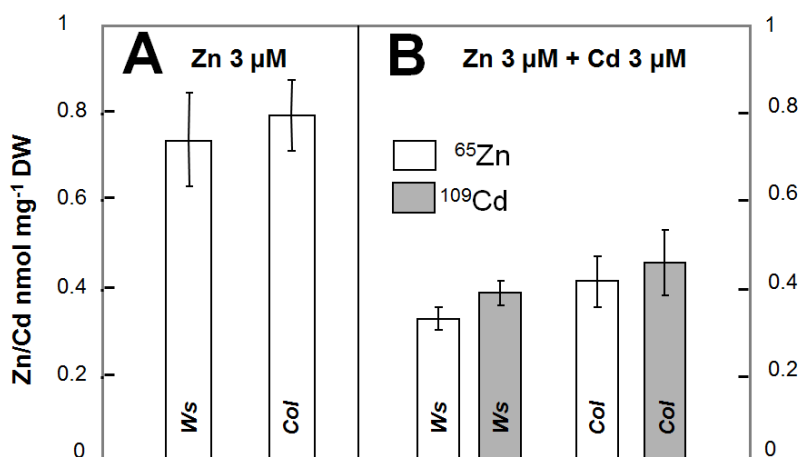

**Fig. S1** Daily uptake of Zn (white bars) and Cd (grey bars) when plants were placed in 3 μM Zn (A) or 3 μM Zn plus 3 μM Cd (B) as followed through <sup>65</sup>Zn and <sup>109</sup>Cd absorption. Values are the mean of at least 3 experiments; error bars represent standard error to the mean.
